# Supplementary material for: Nuclear soluble cGAS senses double-stranded DNA virus infection
Source: PubMed Central journal article supplement (PMC9090744; doi:10.1038/s42003-022-03400-1), 2022-05-10
Supplement: 42003_2022_3400_MOESM2_ESM.pdf [file 42003_2022_3400_MOESM2_ESM.pdf]

1 **Supplemental Figure Legends**

2 **Supplemental Figure 1. Endogenous cGAS localizes in the nucleus and tethers to the**

3 **chromatin.** (a) THP-1 cells were transfected with or without 1  $\mu\text{g}/\text{mL}$  ctDNA for 4 h. Then, the cell

4 lysates were fractionated into five fractions and blotted as indicated. STING: membrane marker;

5 TBK1 and  $\beta$ -actin: cytosolic marker; H3: nuclear marker; vimentin: cytoskeletal marker. (b)

6 Lysates of cGAS wild type (WT) and knockout (KO) H1299 cells were blotted as indicated. (c-f)

7 IFA of endogenous cGAS in THP-1 cells (c), HFF-1 cells (d), H596 cells (e), and MDA-MB-231

8 cells (f) transfected with or without ctDNA. cGAS: green; DAPI, blue. Bar = 10  $\mu\text{m}$ . (g) Schematics

9 of cGAS domains, mutants, nuclear export signal (NES), and mitochondrial targeting signal (MTS).

10 (h) Summary of the subcellular localization of FLAG-tagged human cGAS (hcGAS) and the NES

11 deletion mutant (hcGAS-delNES) transfected in HEK293 cells. cGAS localization was determined

12 by IFA using the anti-FLAG antibody. C: cytosolic; N: nuclear; C+N: cytosolic and nuclear. Data

13 represent means  $\pm$  s.d. of three independent experiments ( $> 200$  cells were counted in each field

14 and five fields were counted per experiment). (i) HEK293 cells stably expressing hcGAS-N or

15 hcGAS-delIN were collected and fractionated into five fractions. The fractions were blotted as

16 indicated. C1QBP: membrane marker;  $\alpha$ -tubulin: cytosolic marker; H3: nuclear marker.

17

18 **Supplemental Figure 2. HSV-1 infection induces nuclear soluble cGAS.** (a) RAW 264.7

19 macrophages were infected with 1 MOI of HSV-1 KOS for 16 h, and then the subcellular fractions

20 of cell lysates were blotted as indicated. (b) RAW264.7 macrophages were transfected with or

21 without 1  $\mu\text{g}/\text{mL}$  ctDNA for 4 h. Then, the cell lysates were fractionated into five fractions and

22 blotted as indicated. (c) THP-1 monocytes were infected with 1 MOI of HSV-1 McKrae for 16 h,

23 and then the subcellular fractions of cell lysates were blotted as indicated. (d) Mouse bone

24 marrow-derived macrophages were infected with 1 MOI of HSV-1 McKrae for 16 h, and then the

25 subcellular fractions of cell lysates were blotted as indicated. STING: membrane marker;  $\alpha$ -tubulin:

26 cytosolic marker; H3: nuclear marker; ICP8: HSV-1 viral protein. The arrow indicates nuclear  
27 soluble cGAS after viral infection.

28

29 **Supplemental Figure 3. Nuclear soluble cGAS is constitutively active.** (a) HEK293 cells  
30 stably expressing mcGAS or the mcGAS R241E mutant were fractionated and blotted as  
31 indicated. C1QBP: membrane marker;  $\alpha$ -tubulin: cytosolic marker; H3: nuclear marker. The arrow  
32 indicates nuclear soluble cGAS. (b) Wild type HEK293 cells, HEK293 cells stably expressing  
33 mcGAS or the R241E mutant were lysed. The lysates were harvested for *in vitro* cGAS enzymatic  
34 activity assays with vs. without adding ctDNA into the enzymatic reaction mixture. The production  
35 of cGAMP was determined by ELISA. Data represent means  $\pm$  s.d. of three independent  
36 experiments. The *P*-value was calculated by two-way ANOVA followed by Sidak's multiple  
37 comparisons test. (c) RAW264.7 cells were mock transfected, transfected with ctDNA or infected  
38 with HSV-1 McKrae for 16 h. The cytoplasmic, nuclear soluble and chromatin-bound fractions  
39 were harvested and then each fraction was added ctDNA for *in vitro* cGAS enzymatic activity  
40 assays. Data represent means  $\pm$  s.d. of three independent experiments. The *P*-value was  
41 calculated by two-way ANOVA followed by Sidak's multiple comparisons test. (d) RAW264.7 cells  
42 were mock infected or infected with HSV-1, VACV, IAV, or VSV for 16 h. The nuclear soluble  
43 extracts were harvested and then added ctDNA for *in vitro* cGAS enzymatic activity assays. Data  
44 represent means  $\pm$  s.d. of three independent experiments. The *P*-value was calculated by one-  
45 way ANOVA followed by Dunnett's multiple comparisons test.

46

47 **Supplemental Figure 4. Establishment of doxycycline-induced cGAS stable lines.** (a)  
48 Lysates of wild type HEK293 and HEK293 stably expressing doxycycline-induced mcGAS or  
49 indicated mcGAS mutants were blotted as indicated. (b) HEK293 cells stably expressing Dox-  
50 inducible, FLAG-tagged mcGAS, mcGAS-NLS, or LL/RK-NLS were treated with 2  $\mu$ g/mL Dox for

51 24 h. Then, the cells were fixed and stained with anti-cGAS antibody and DAPI. FLAG: red; DAPI,  
52 blue. Bar = 10  $\mu$ m. (c) Lysates of cGAS wild type and knockout RAW264.7 macrophages were  
53 blotted as indicated. (d) Wild type and cGAS knockout RAW264.7 macrophages were mock  
54 infected or infected with HSV-1 d109 for 16 h. Real-time PCR was performed to determine the  
55 relative mRNA levels of IFN $\beta$ , IP-10, and RANTES. Data represent means  $\pm$  s.d. of three  
56 independent experiments. The *P*-value was calculated by two-way ANOVA followed by Sidak's  
57 multiple comparisons test. (e) Lysates of RAW264.7 cells, cGAS KO cells, KO cells reconstituted  
58 with mcGAS and LL/RK-NLS cells were blotted as indicated.

59

60 **Supplemental Figure 5. Nuclear soluble cGAS induces innate immune responses.** (a) The  
61 cGAS KO, KO(mcGAS), KO(LL/RK-NLS) RAW264.7 cells were treated with Dox for 24 h and  
62 then infected with 1 MOI of HSV-1 KOS d109 for designated times. Real-time PCR was performed  
63 to determine the relative RANTES mRNA levels. Data represent means  $\pm$  s.d. of three  
64 independent experiments. The *P*-value was calculated by two-way ANOVA followed by Dunnett's  
65 multiple comparisons test. (b) The cGAS KO, KO(mcGAS), KO(LL/RK-NLS) RAW264.7 cells  
66 were treated with Dox for 24 h and then stimulated with 1  $\mu$ g/mL of ctDNA by transfection for  
67 designated times. Real-time PCR was performed to determine the relative IP-10 mRNA levels.  
68 Data represent means  $\pm$  s.d. of three independent experiments. The *P*-value was calculated by  
69 two-way ANOVA followed by Tukey's multiple comparisons test. (c) The doxycycline-induced  
70 LL/RK-NLS mutant expressing HEK293 and HEK293T cells were treated with Dox for 24 h. Cell  
71 lysates were harvested and blotted as indicated. (d) The doxycycline-induced LL/RK-NLS mutant  
72 expressing HEK293 and HEK293T cells were treated with Dox for 24 h and then infected with 1  
73 MOI of HSV-1 d109 for 16 h. Cell lysates were harvested and blotted as indicated. (e) The  
74 doxycycline-induced LL/RK-NLS mutant expressing HEK293 and HEK293T cells were treated  
75 with Dox for 24 h and then infected with 1 MOI of HSV-1 KOS d109 for 16 h. Real-time PCR was

76 performed to determine the relative IFN $\beta$  mRNA levels. Data represent means  $\pm$  s.d. of three  
77 independent experiments. The *P*-value was calculated by two-way ANOVA followed by Sidak's  
78 multiple comparisons test. (f) HEK293 cells stably expressing FLAG tagged LL/RK-NLS mutant  
79 were infected with HSV-1-GFP for 16 h. CHIP assays were performed using the anti-FLAG  
80 antibody. Real-time PCR was performed to determine the relative binding amount of GFP and  
81 viral gene VP16. Data represent means  $\pm$  s.d. of three independent experiments. The *P*-value  
82 was calculated by two-way ANOVA followed by Sidak's multiple comparisons test.

83

84 **Supplemental Figure 6. cGAS limits VACV and VSV infection.** (a) The cGAS WT and KO  
85 RAW264.7 macrophages were infected with VACV-Luc and VSV-Luc for 16 h. Luciferase  
86 activities were measured to determine the relative infection activity. Data represent means  $\pm$  s.d.  
87 of three independent experiments. The *P*-value was calculated by two-way ANOVA followed by  
88 Sidak's multiple comparisons test.

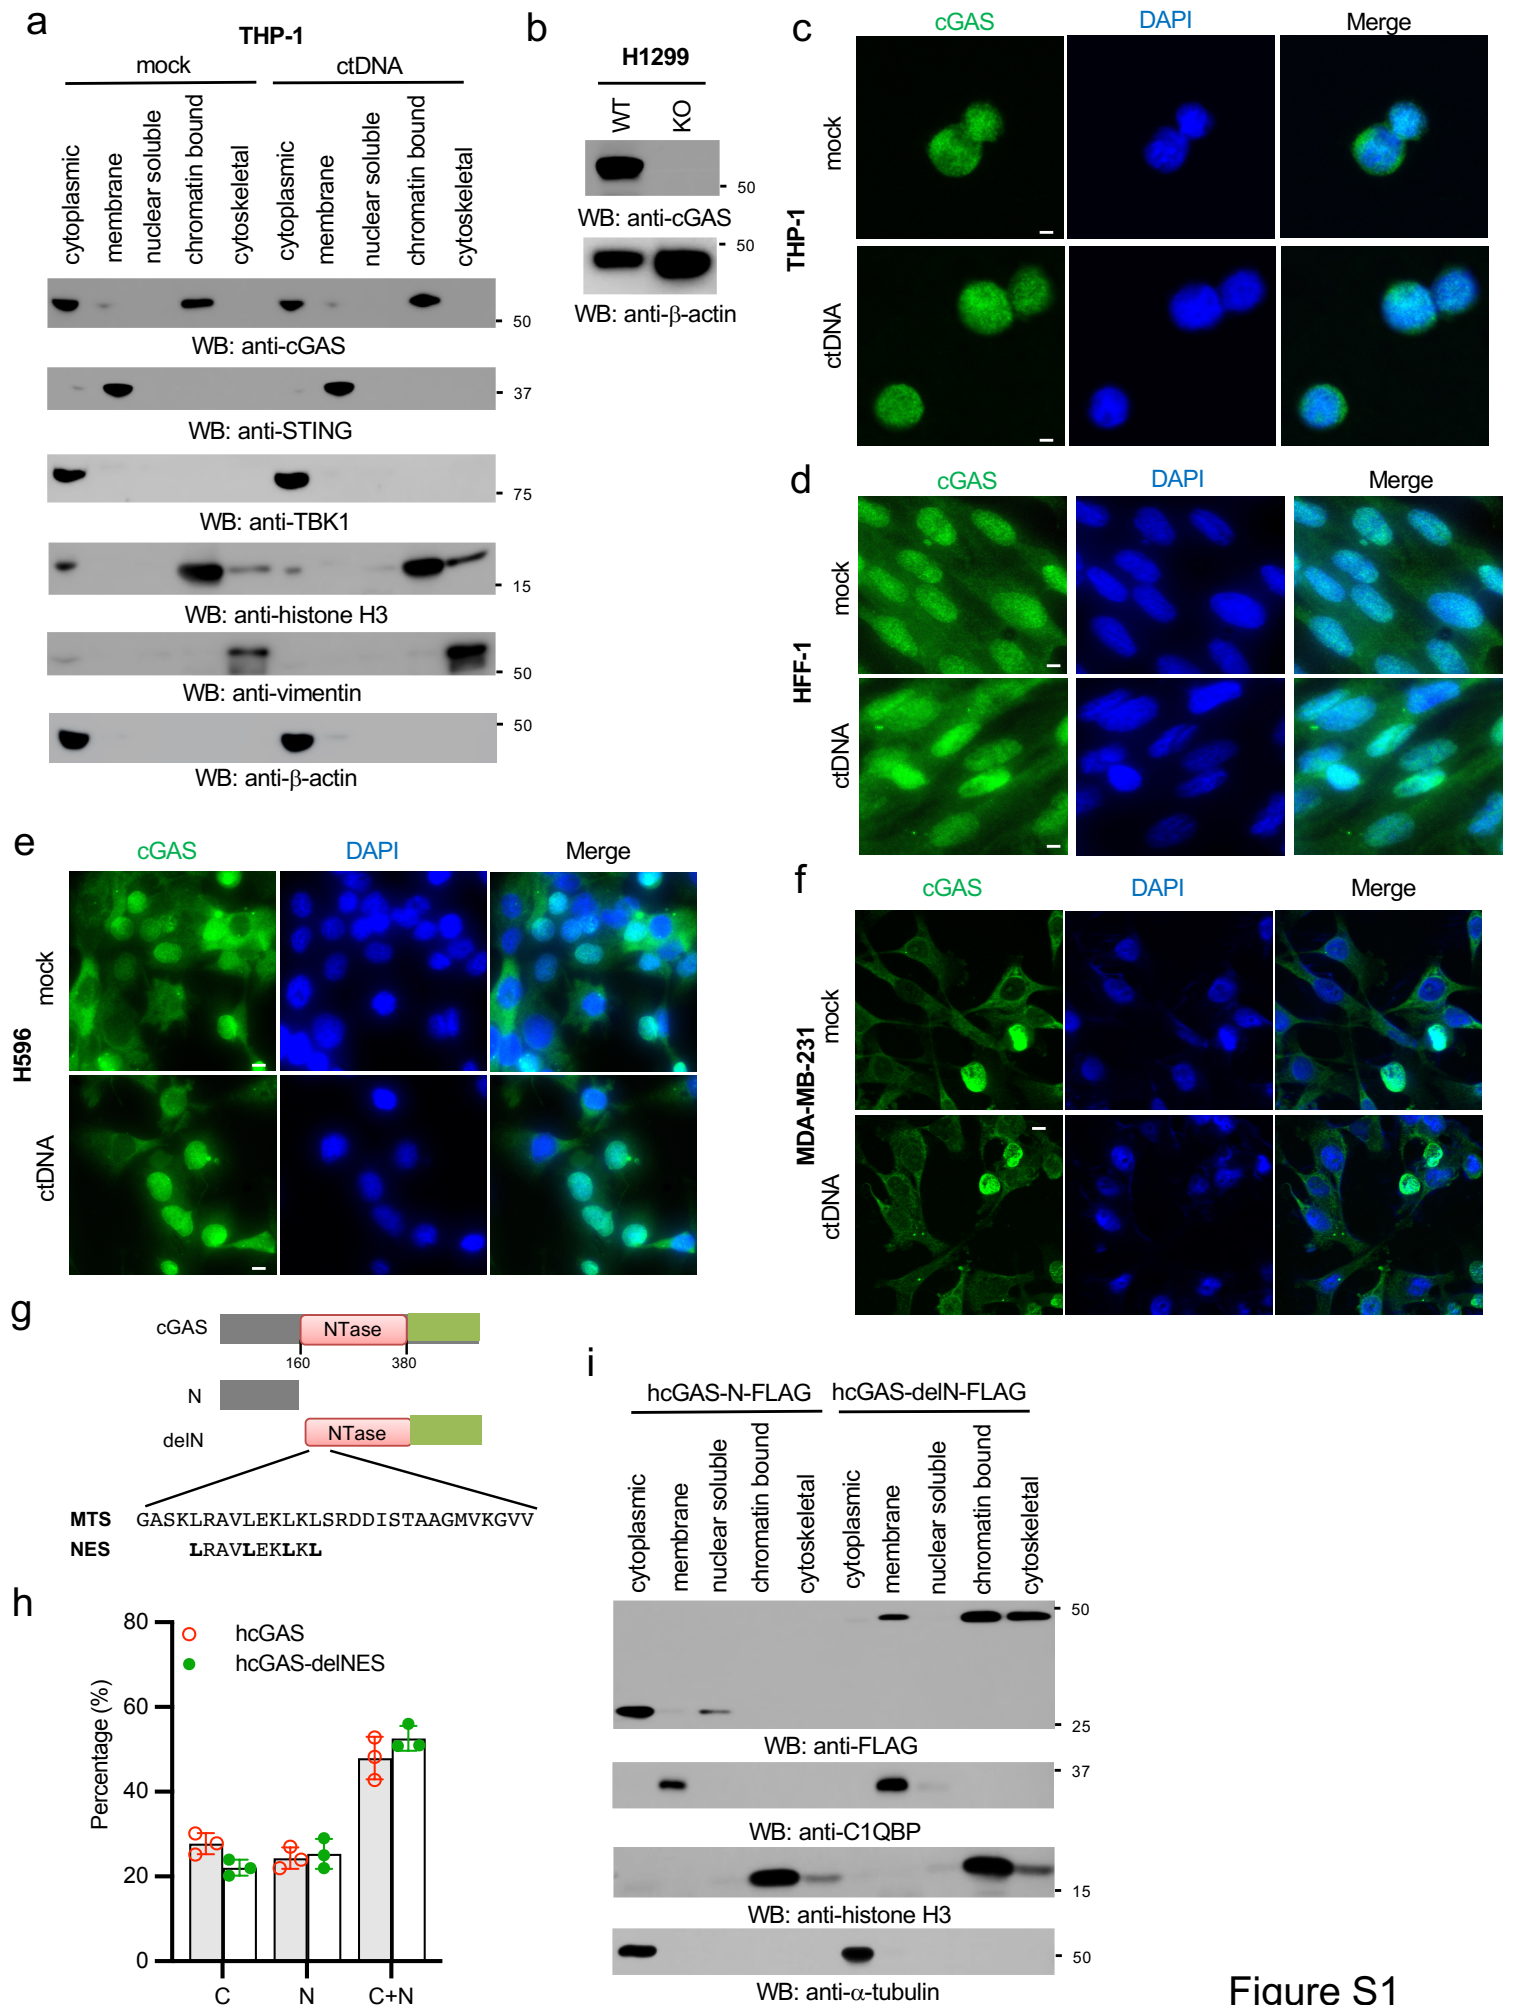

Figure S1

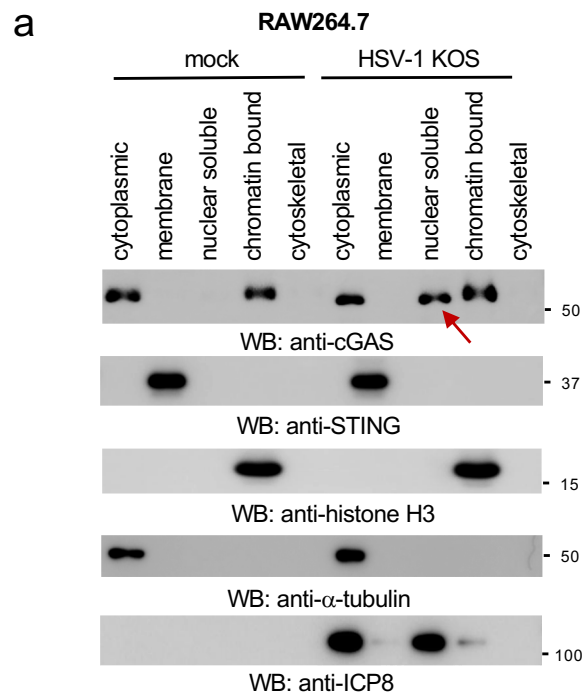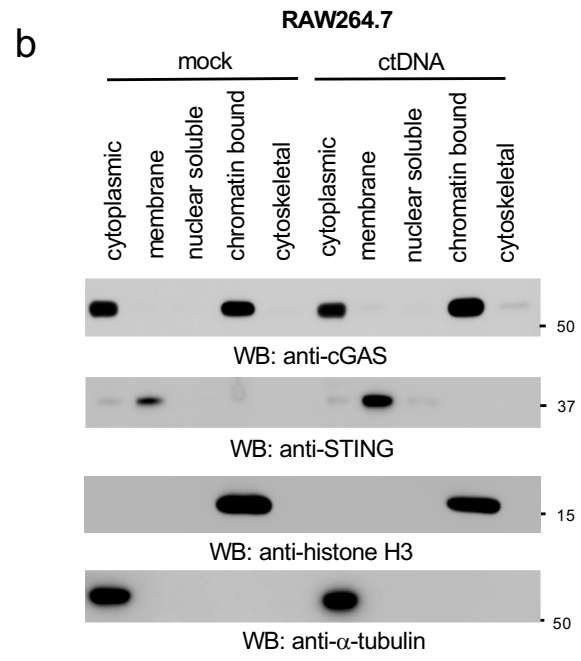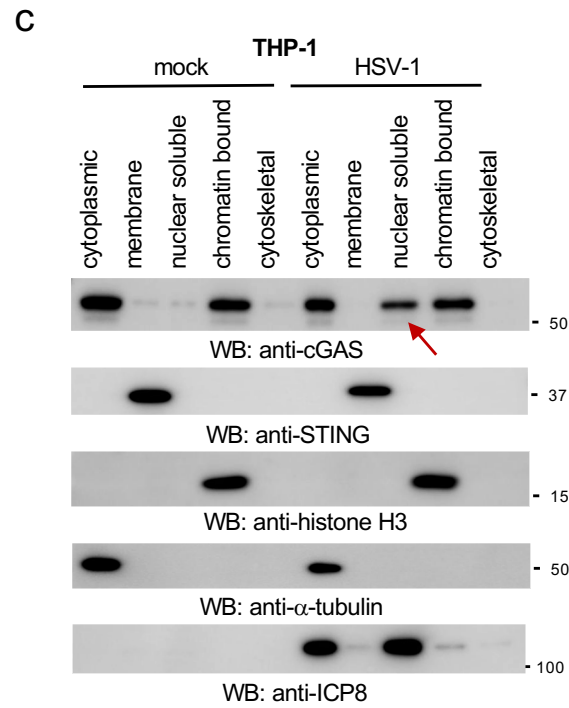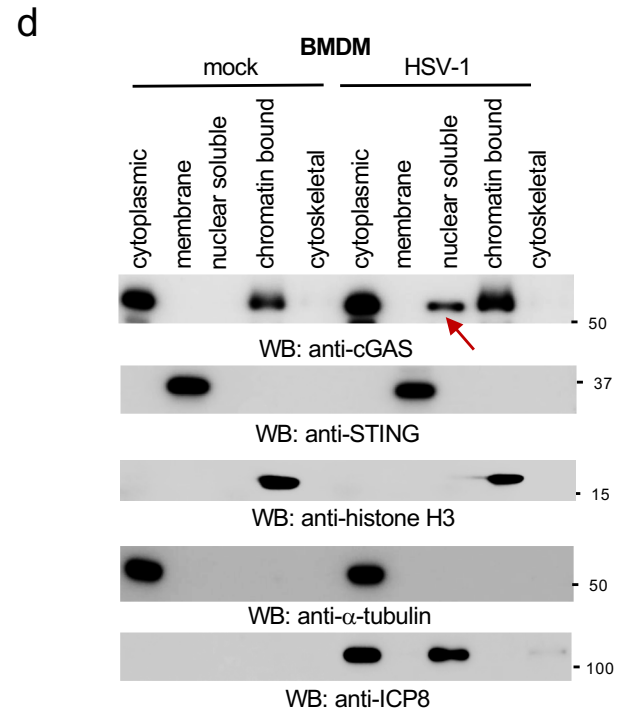

Figure S2

**a**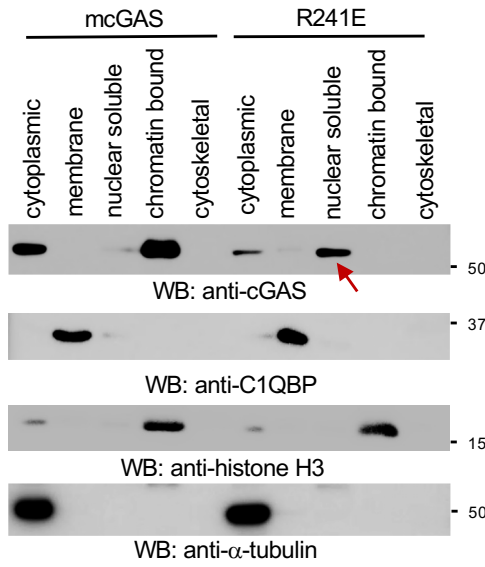**b**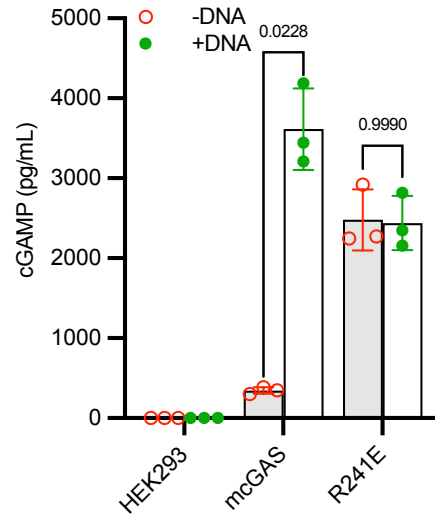**c**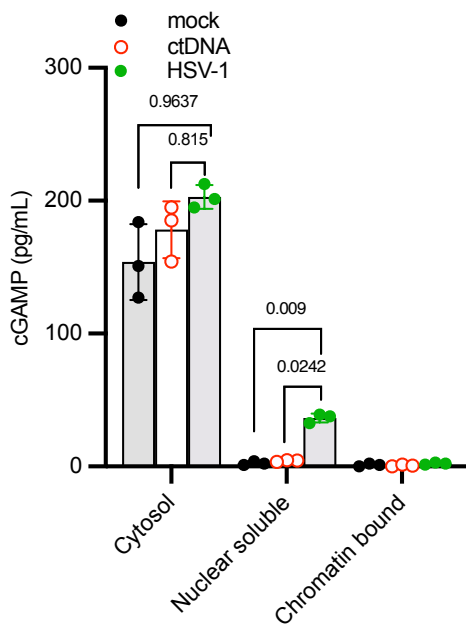**d**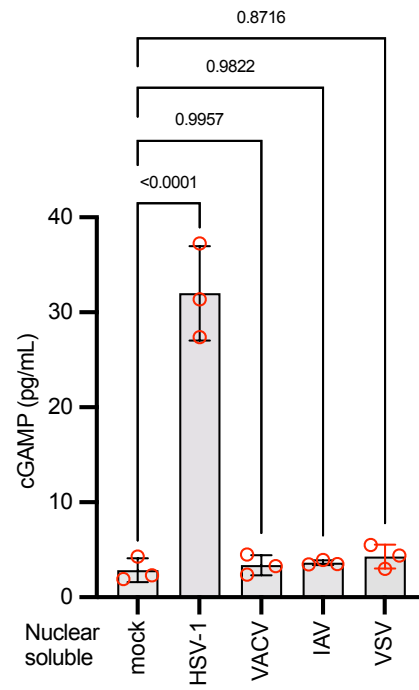

Figure S3

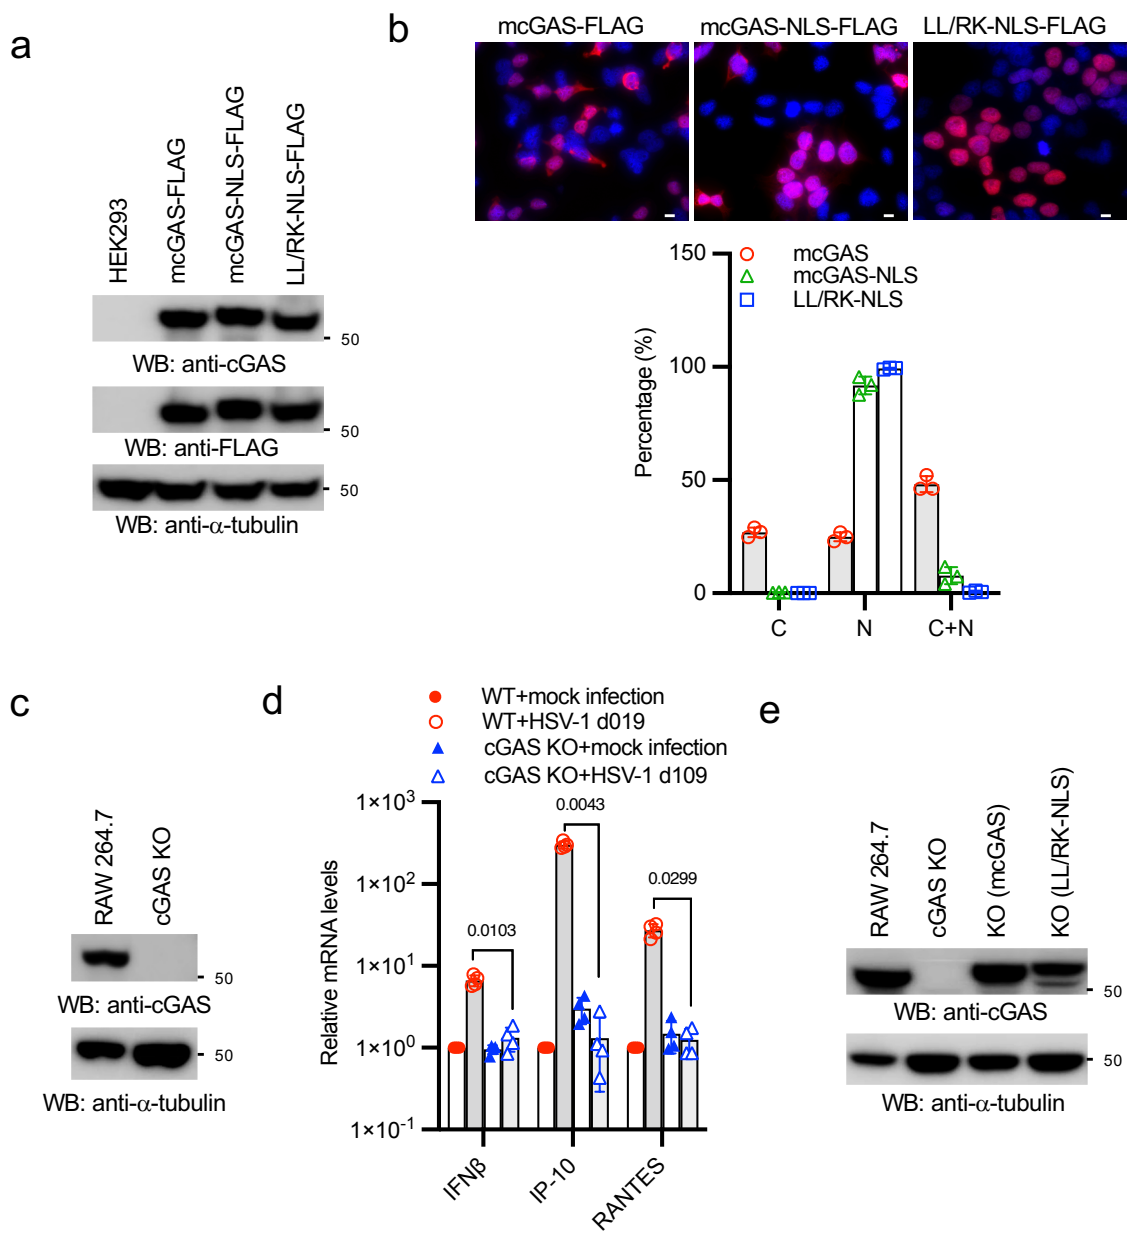

Figure S4



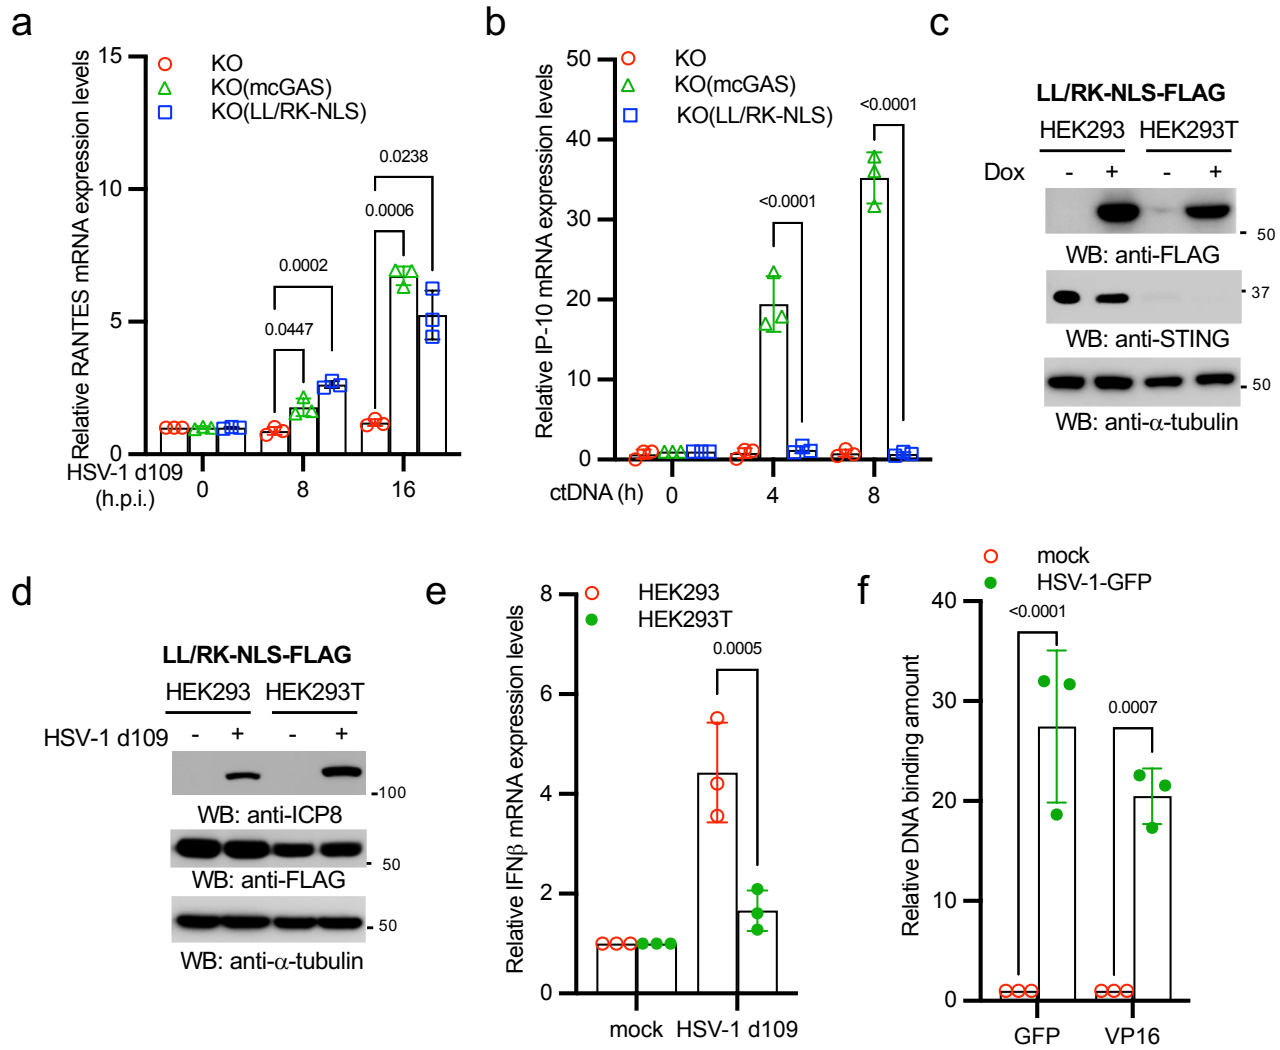

Figure S5

a

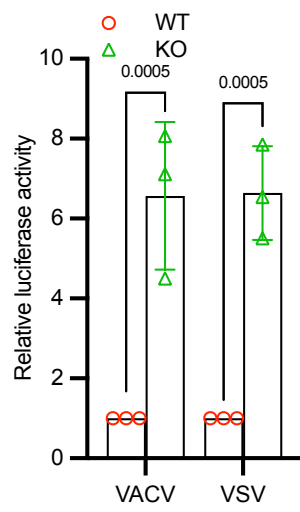

Figure S6

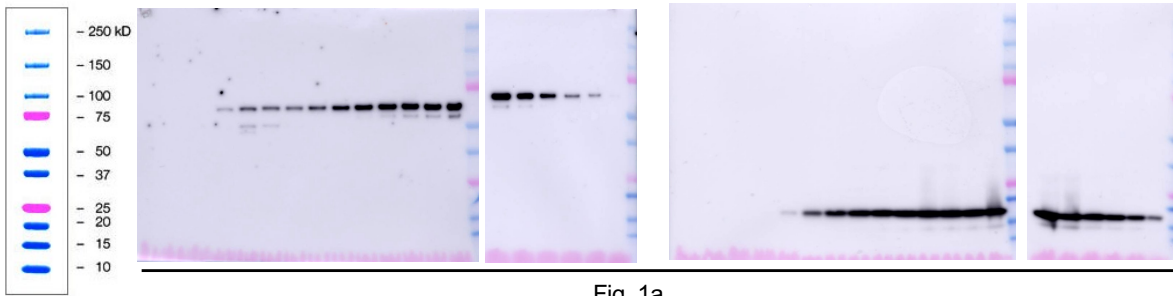

Fig. 1a

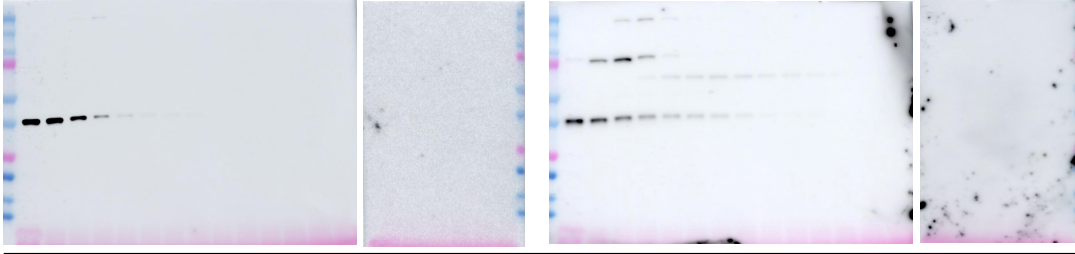

Fig. 1a

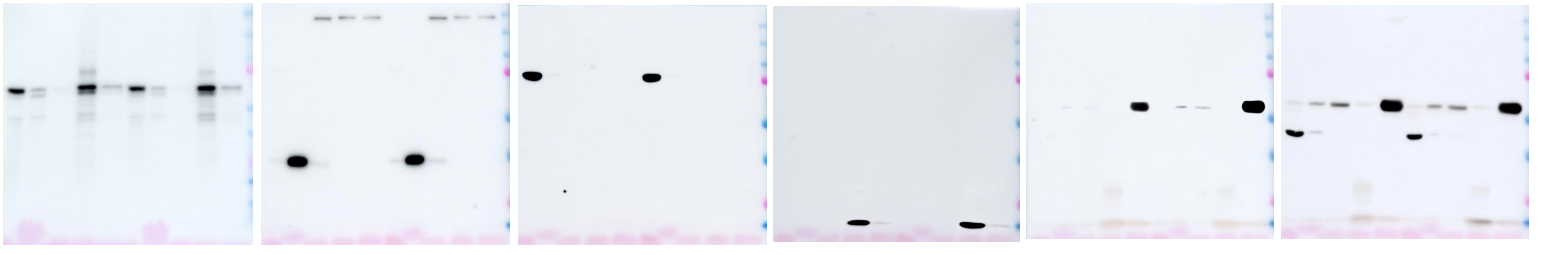

Fig. 1b

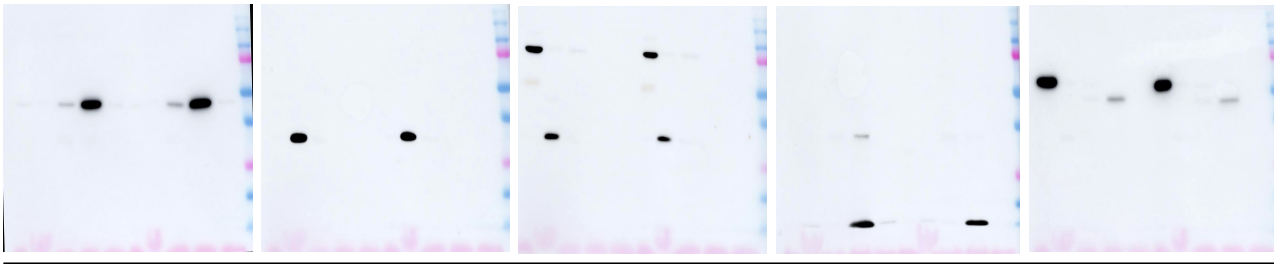

Fig. 1g

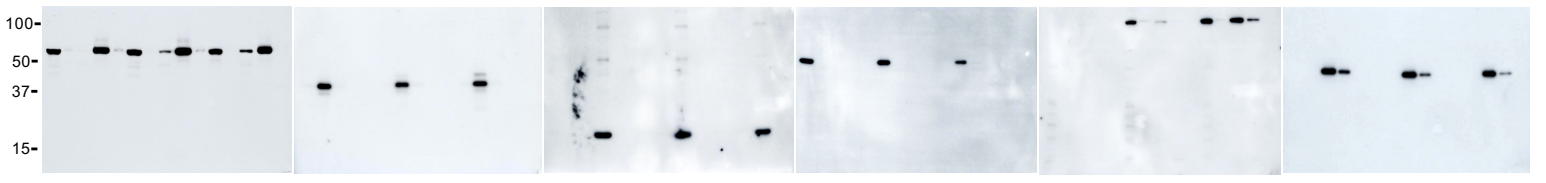

Fig. 2a

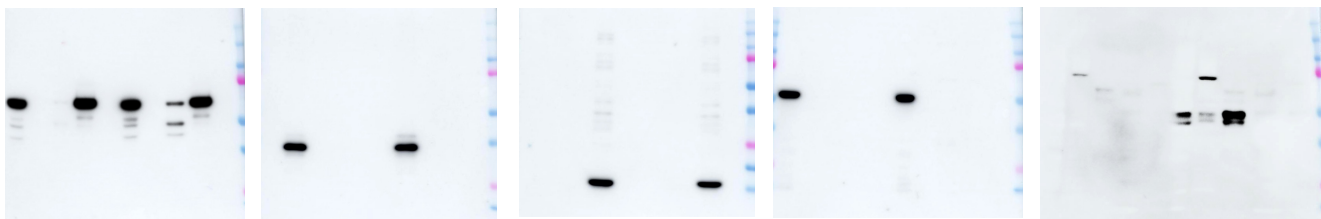

Fig. 2b

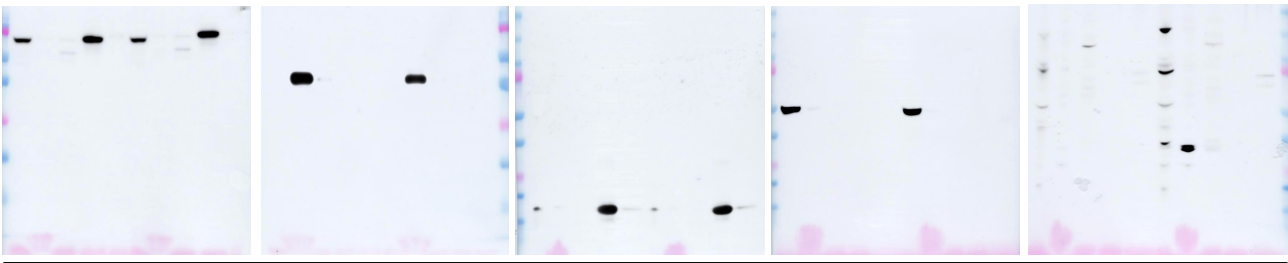

Fig. 2c

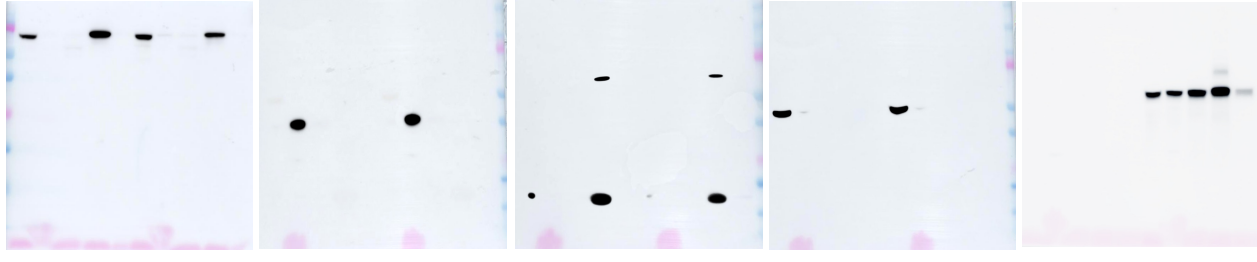

Fig. 2d

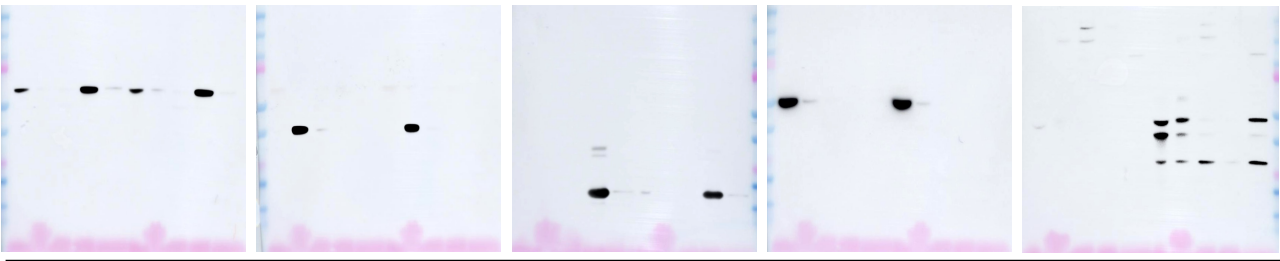

Fig. 2e

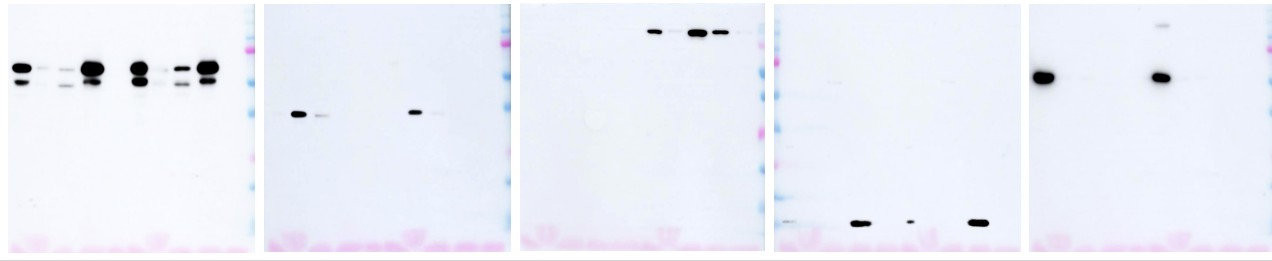

Fig. 3a

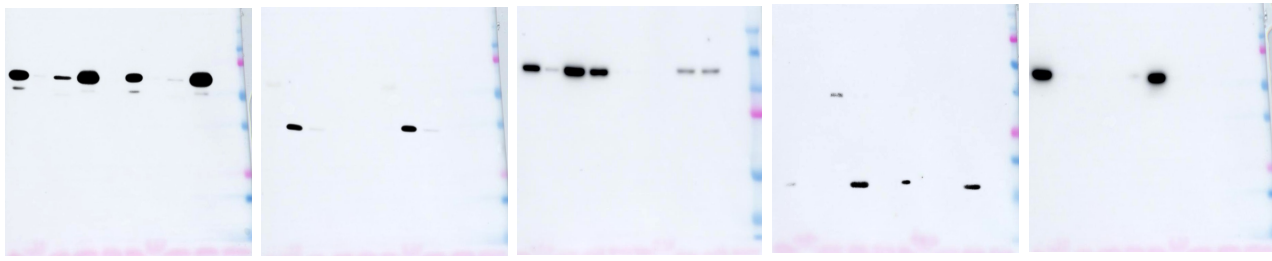

Fig. 3b

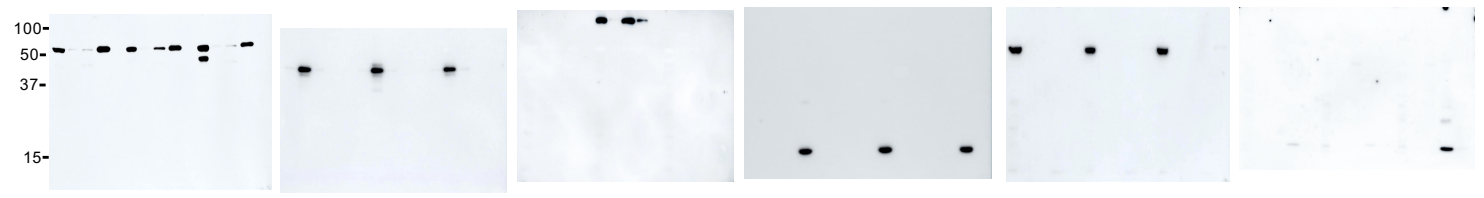

Fig. 3c

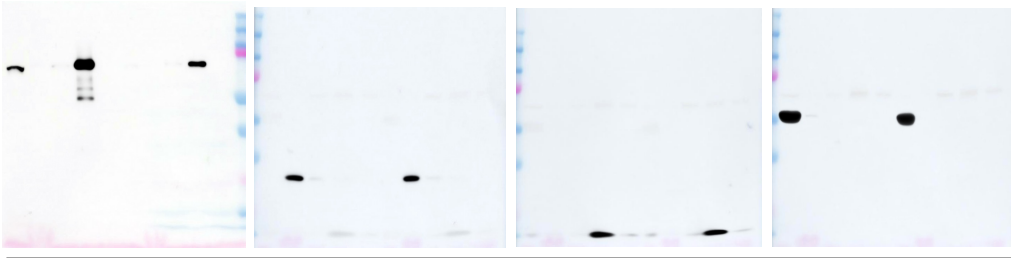

Fig. 4a

Fig. 4c

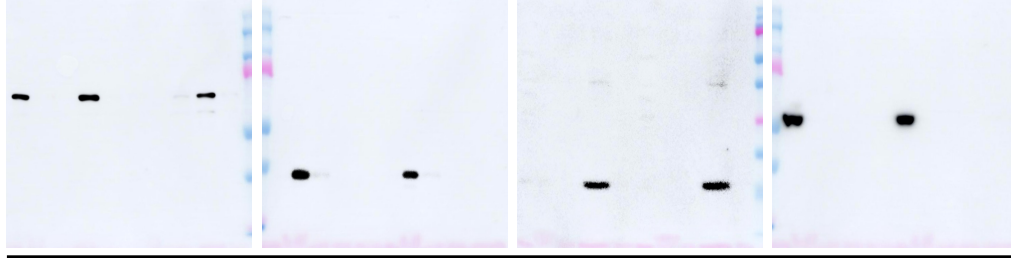

Fig. 4d

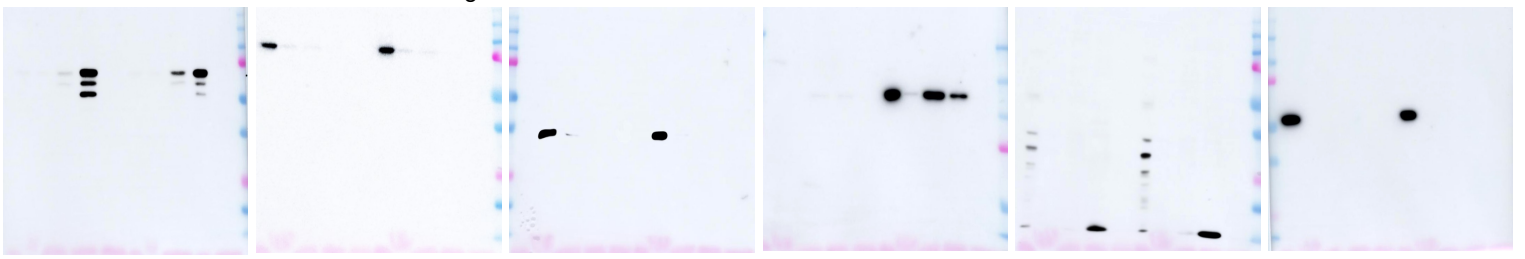

Fig. 5a

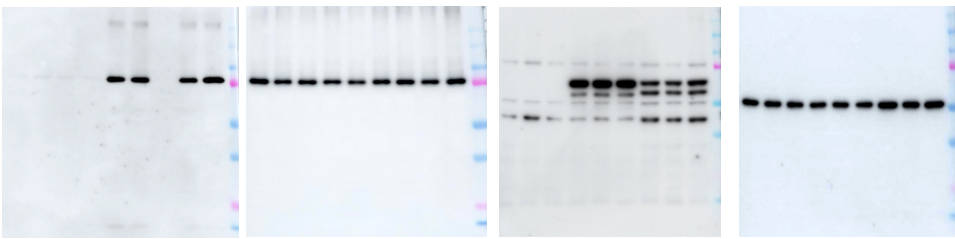

Fig. 5d

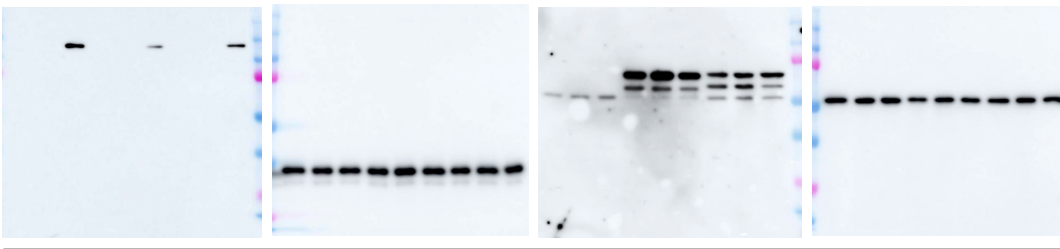

Fig. 6c

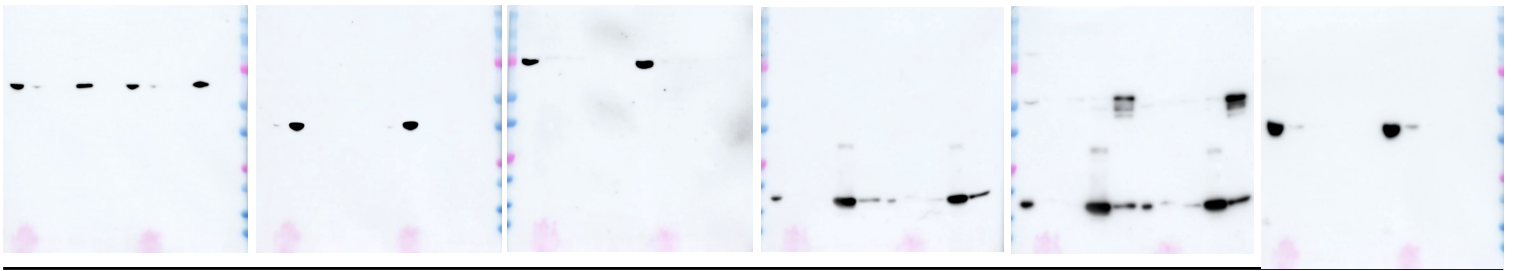

Fig. S1a

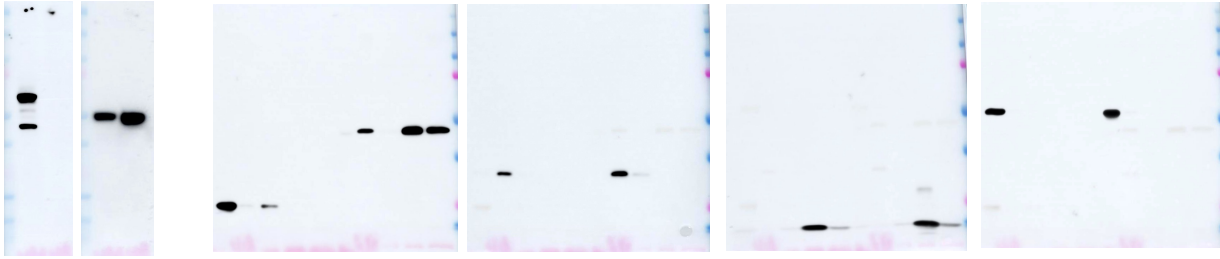

Fig. S1b

Fig. S1l

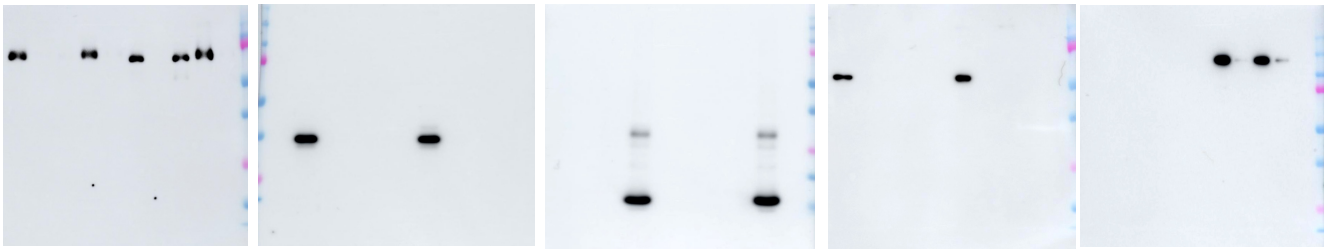

Fig. S2a

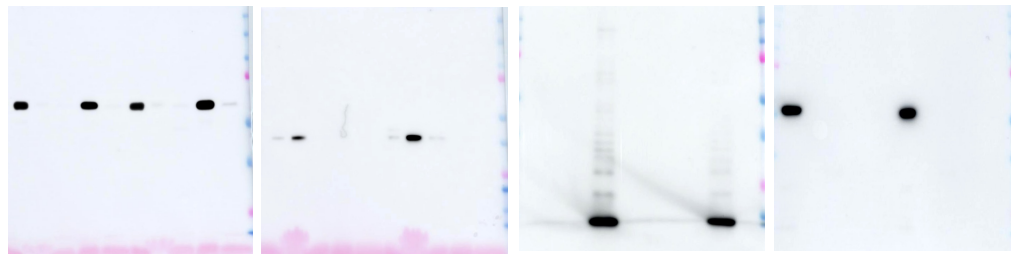

Fig. S2b

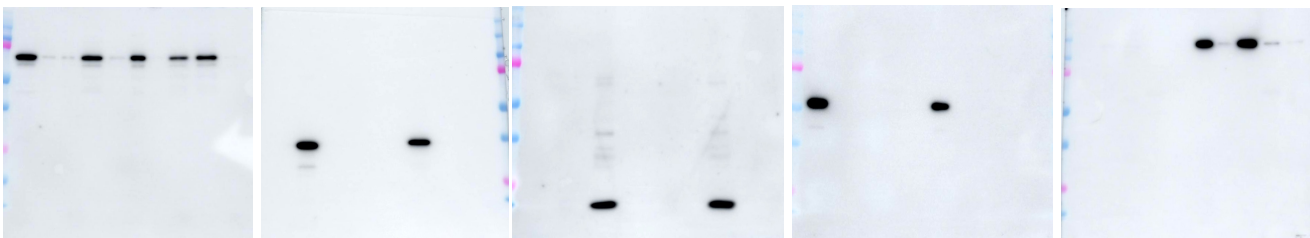

Fig. S2c

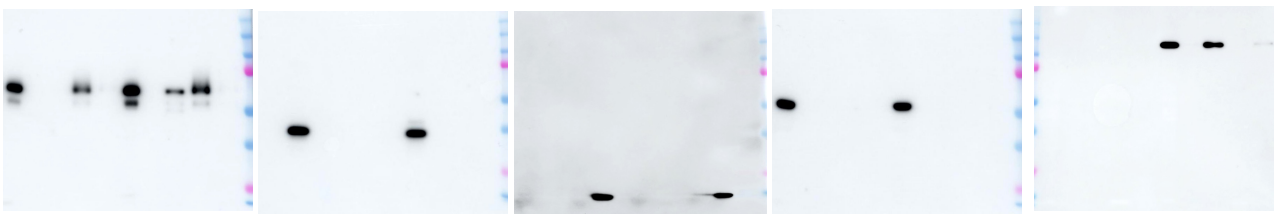

Fig. S2d

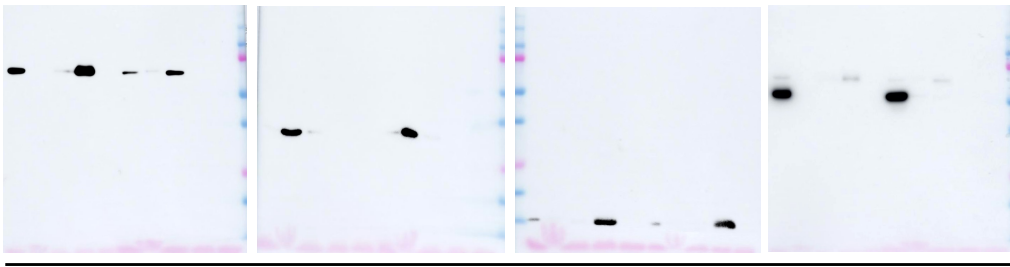

Fig. S3a

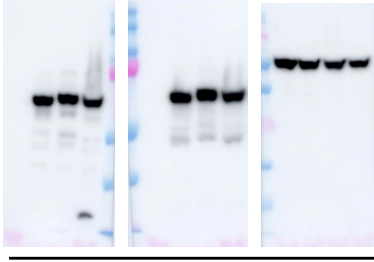

Fig. S4a

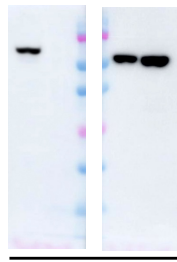

Fig. S4c

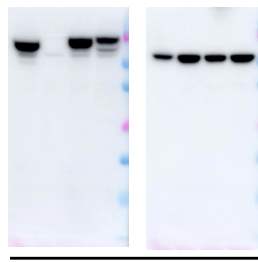

Fig. S4e

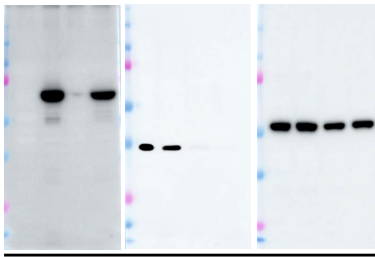

Fig. S5d

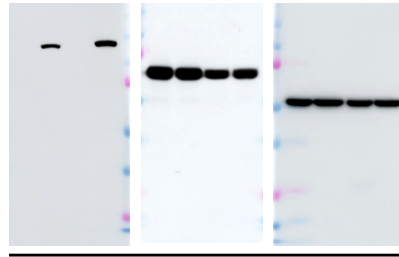

Fig. S5e
