# Supplementary material for: Nuclear soluble cGAS senses double-stranded DNA virus infection
Source: PubMed Central journal article supplement (PMC9090744; doi:10.1038/s42003-022-03400-1), 2022-05-10
Supplement: 42003_2022_3400_MOESM3_ESM.pdf [file 42003_2022_3400_MOESM3_ESM.pdf]

## Description of Additional Supplementary Files

**File name:** Supplementary Data 1

**Description:** Source data for figures.
